# Supplementary material for: Identification of key peptidoglycan hydrolases for morphogenesis, autolysis, and peptidoglycan composition of Lactobacillus plantarum WCFS1
Source: PubMed Central journal article supplement (PMC3533731; doi:10.1186/1475-2859-11-137), 2012-10-15
Supplement: 1475-2859-11-137-S1.pdf [file 1475-2859-11-137-S1.pdf]

**Table S1.** Primers used for cloning and validation

| Primer name                                              | Sequence <sup>a</sup>            | Mutant strain or plasmid |
|----------------------------------------------------------|----------------------------------|--------------------------|
| <b>Primers used for construction of deletion vectors</b> |                                  |                          |
| Acm2_1                                                   | 5'-AATAGCTTTTTGTTGTTTCAGGTG-3'   |                          |
| Acm2_2_II                                                | 5'-TGGCTCCGATATCTGAGTCGC-3'      | TR0010                   |
| Acm2_3_II                                                | 5'-ACTTAGCAATAATGAAGTTACTAC-3'   |                          |
| Acm2_4                                                   | 5'-ATTCAGGAATCGTATCACATTGTGC-3'  |                          |
| Lys2_1                                                   | 5'-TTGTCGAAGAAGCTGGTGCTCC-3'     |                          |
| Lys2_2_bis                                               | 5'-AACTCTGGTGCTTACCATTACG-3'     | TR0011                   |
| Lys2_3                                                   | 5'-AAGGGGATTTAGTATAATAATTG-3'    |                          |
| Lys2_4                                                   | 5'-TACCGAAATGAATTTGATGCC-3'      |                          |
| Acm1_1                                                   | 5'-AACGGTAAAGTAACCATTCTCATACG-3' |                          |
| Acm1_2                                                   | 5'-ATCATAGCCGCCTCCTTTCTGG-3'     | TR0012                   |
| Acm1_3_bis                                               | 5'-TATGCGACTGATCCAAGTTATGC-3'    |                          |
| Acm1_4                                                   | 5'-TTCTAGTTCTAGCCGCTCACC-3'      |                          |
| Lys1_1                                                   | 5'-AAGCATTTTACAGAGATTACGG-3'     |                          |
| Lys1_2                                                   | 5'-AATCCTTTGCCTACAGCATTAAGC-3'   | TR0013                   |
| Lys1_3                                                   | 5'-AACGGGACTCGTCAAGAGTTC-3'      |                          |
| Lys1_4                                                   | 5'-AACAGTTTATTAGCTGCTAGGCTG-3'   |                          |
| LytH_1                                                   | 5'-ACCATCGTGGCATCAATCTCG-3'      |                          |
| LytH_2                                                   | 5'-TGCTTTGTACCAACTAGATTTAAG-3'   | TR0014                   |
| LytH_3                                                   | 5'-AAGTACCCTCAAGAAGTAGC-3'       |                          |
| LytH_4                                                   | 5'-TGTGATAACTGATGATTGTAGC-3'     |                          |
| LytA_1                                                   | 5'-TACGATTGGCTCCTCTGAAGC-3'      |                          |
| LytA_2                                                   | 5'-ATTAAGAGCACAGCTTACTACAC-3'    | TR006                    |
| LytA_3                                                   | 5'-AAAAAGAATGTCACGTATGTAC-3'     |                          |
| LytA_4                                                   | 5'-AATACACTTTTAGTATACCGC-3'      |                          |
| LytB_1                                                   | 5'-ATGAAACCTTGAAAAACGAACACC-3'   |                          |
| LytB_2                                                   | 5'-ATGCCAAGTTTTGCAGGTACG-3'      | TR0015                   |
| LytB_3                                                   | 5'-TAGGACCTTGCCCGTTGTATGTGC-3'   |                          |
| LytB_4                                                   | 5'-TTGGCGTGTGGAAAGAGTGTTTCG-3'   |                          |
| LytD_1                                                   | 5'-AAACTGGCAAAACGGTATCACC-3'     |                          |
| LytD_2                                                   | 5'-ATGATTGACGCTCAGGACAATGG-3'    | TR0016                   |
| LytD_3                                                   | 5'-AACAATCAGTGTGATAAGACG-3'      |                          |
| LytD_4                                                   | 5'-TACGGTGTATACCTTTCATATCC-3'    |                          |
| MltA_1                                                   | 5'-TTGATGAAGTTGCTCGTCATTGG-3'    |                          |
| MltA_2                                                   | 5'-AACGCACAAGGCATGGCTGC-3'       | TR0017                   |
| MltA_3                                                   | 5'-AGCGAATAAAGCTAATGCAGC-3'      |                          |
| MltA_4                                                   | 5'-ATCGGTAAGTACCAATTAAGTGC-3'    |                          |
| <b>Primers used for the validation of deletions</b>      |                                  |                          |
| Check_Acm2_UP                                            | 5'-AAGTGTTGACGCCGCTTAACC-3'      | TR0010                   |
| Check_Acm2_DO                                            | 5'-TTAGCAATGTTTGTAGCACGGGC-3'    |                          |
| Check_Lys2_UP                                            | 5'-AAGCACGCCTCTAATACACC-3'       | TR0011                   |
| Check_Lys2_DO                                            | 5'-ATGTTAAAAGAACGGGTAAGTGC-3'    |                          |

|                                                                                      |                                                        |                 |
|--------------------------------------------------------------------------------------|--------------------------------------------------------|-----------------|
| Check_Acm1_UP                                                                        | 5'-TTCGCTGTCGGTGAAAGTGG-3'                             | TR012           |
| Check_Acm1_DO                                                                        | 5'-TATTTTCGTTATCGCCGTATACC-3'                          |                 |
| Check_Lys1_UP                                                                        | 5'-TAAGTCAGCGACAATGTATTCGG-3'                          | TR013           |
| Check_Lys1_DO                                                                        | 5'-ATGGCGGGAATAAACACTCG-3'                             |                 |
| Check_LytH_UP                                                                        | 5'-ATTCTTAACCAATCCGTTG-3'                              | TR014           |
| Check_LytH_DO                                                                        | 5'-TATCAAAACCACAAAAATCG-3'                             |                 |
| Check_LytA_UP                                                                        | 5'-TTGAAAATCGGTGTGTGAAC-3'                             | TR006           |
| Check_LytA_DO                                                                        | 5'-TACATTCGTTAAAATAACAGACC-3'                          |                 |
| Check_LytB_UP                                                                        | 5'-ACAAGTACTCAACAATATGC-3'                             | TR015           |
| Check_LytB_DO                                                                        | 5'-TATTTAAGCACTCGGTATTC-3'                             |                 |
| Check_LytD_UP                                                                        | 5'-AACTTACGACAAAAGGGTGTGG-3'                           | TR016           |
| Check_LytD_DO                                                                        | 5'-AACACGGTCTTGAATGACGCC-3'                            |                 |
| Check_MltA_UP                                                                        | 5'-ATGCCCCGATAGATATATTC-3'                             | TR017           |
| Check_MltA_DO                                                                        | 5'-TTCTGATAGTGCTGCTAAGGC-3'                            |                 |
| <b>Primers used for the sequencing of deletion vectors</b>                           |                                                        |                 |
| 85                                                                                   | 5'-GTTTTTTTCTAGTCCAAGCTCACA-3'                         |                 |
| 85_compl                                                                             | 5'-TTATTCGTTTGATTCGCTTTCG-3'                           | pNZ5319         |
| 87_bis                                                                               | 5'-TTGATGATTGGTTCGGAAGGCACG-3'                         |                 |
| 87_bis_compl                                                                         | 5'-TATATAGTTTACCCCGTCAGC-3'                            |                 |
| <b>Primers used for the construction of over-expression vectors</b>                  |                                                        |                 |
| Acm2_NcoI                                                                            | 5'- <u>CTTCCATG</u> GGGACAAAAAAGTAGTAACTT -3'          | pGITR010        |
| Acm2_XbaI                                                                            | 5'- <u>TTTTCTAG</u> ACCCCTAGCCTTCAAGCTTAGCAACATAGTG-3' |                 |
| Lys2_NcoI                                                                            | 5'- <u>CTTCCATGGG</u> TAAATTTTAAATCACAAAATCC -3'       | pGITR011        |
| Lys2_XbaI                                                                            | 5'- <u>CCCTCTAG</u> ATTAGCCAATCTTAGC -3'               |                 |
| <b>Primers used for the validation of the acquisition of over-expression vectors</b> |                                                        |                 |
| pNZ8048_UP                                                                           | 5'-TACTGACAATAGAAACATTAAC-3'                           | pNZ8048         |
| pNZ8048_DO                                                                           | 5'-TATCAATCAAAGCAACAC-3'                               | and derivatives |

<sup>a</sup> Restriction sites introduced in the primers are underlined

**Table S2.** Transcriptomic data of PGH-encoding genes of *L. plantarum* WCFS1 grown in chemically defined medium (CDM) at 28°C (fermentors F12 and F27, mean value) vs. CDM + 300mM NaCl at 28°C (fermentors F6 and F28, mean value), CDM at 37°C (fermentor F18), and CDM + 300mM NaCl + two-fold higher concentration of amino-acids at 37°C (defined here as SCDM conditions) (fermentor F21) (FermDB platform, <http://www.cmbi.ru.nl/fermDB>, [1])

| Gene name <sup>a</sup>       | Microarray fold change <sup>a</sup> |            |                                             |
|------------------------------|-------------------------------------|------------|---------------------------------------------|
|                              | 300mM NaCl                          | 37°C       | 300mM NaCl, 2 x [aa], 37°CSCDM <sup>b</sup> |
| <i>acm2</i> (lp_2645)        | 1.0                                 | 1.1        | 1.0                                         |
| <b><i>lys2</i> (lp_3093)</b> | <b>1.6</b>                          | <b>2.4</b> | <b>3.2</b>                                  |
| <b><i>acm1</i> (lp_1138)</b> | <b>1.9</b>                          | <b>3.0</b> | <b>2.8</b>                                  |
| <i>lys1</i> (lp_1158)        | 1.1                                 | 1.1        | 1.1                                         |
| <b><i>lytH</i> (lp_1982)</b> | <b>0.2</b>                          | <b>0.4</b> | <b>0.2</b>                                  |
| <i>lytA</i> (lp_3421)        | 1.0                                 | 1.1        | 1.1                                         |
| <i>lytB</i> (lp_2162)        | 1.0                                 | 1.0        | 1.0                                         |
| <b><i>lytC</i> (lp_2520)</b> | <b>1.6</b>                          | <b>1.5</b> | <b>1.9</b>                                  |
| <b><i>lytD</i> (lp_1242)</b> | 0.9                                 | 1.0        | <b>2.1</b>                                  |
| <i>mltA</i> (lp_0302)        | 1.3                                 | 1.2        | 1.1                                         |
| <b><i>mltB</i> (lp_3014)</b> | <b>1.7</b>                          | <b>1.6</b> | <b>1.8</b>                                  |
| <b><i>mltC</i> (lp_3015)</b> | <b>0.2</b>                          | <b>0.6</b> | <b>0.4</b>                                  |

<sup>a</sup> Genes for which the expression is  $\leq$  or  $\geq 1.5$  fold repressed or induced are indicated in bold.

<sup>b</sup> SCDM, stress chemically defined medium, stress conditions used in this work for phenotypic characterization of PGH-deficient strains.

**Table S3.** Differences in mucopeptide composition resulting from *N*-acetylglucosaminidase and  $\gamma$ -D-Glu-mDAP mucopeptidase activities between *L. plantarum* NZ7100 (WT) and TR0010 (Acm2<sup>-</sup>) or TR006 (LytA<sup>-</sup>).

| Peak <sup>a</sup> | Proposed structure <sup>b</sup>              | Observed m/z | Calculated <sup>c</sup> [M+Na] <sup>+</sup> | Acm2 <sup>-d</sup> | LytA <sup>-d</sup> |
|-------------------|----------------------------------------------|--------------|---------------------------------------------|--------------------|--------------------|
| <b>3</b>          | <b>Tetra missing GlcNAc</b>                  | 759.31       | 759.35                                      | <b>ND</b>          |                    |
| 5                 | <i>Di</i>                                    | 720.25       | 720.29                                      |                    | <i>Down</i>        |
| 8                 | <i>Tri-D-ALa-mDAP(NH<sub>2</sub>)</i>        | 1133.56      | 1133.53                                     |                    | <i>Down</i>        |
| 15                | <i>Di (Ac)</i>                               | 762.20       | 762.30                                      |                    | <i>Down</i>        |
| 18                | <i>Tri-D-ALa-mDAP(NH<sub>2</sub>) (Ac)</i>   | 1175.52      | 1175.54                                     |                    | <i>Down</i>        |
| 20                | <i>Tetra-D-ALa-mDAP(NH<sub>2</sub>) (Ac)</i> | 1246.50      | 1246.57                                     |                    | <i>ND</i>          |
| 21                | <i>Tri-D-ALa-mDAP(NH<sub>2</sub>) (Ac)</i>   | 1175.48      | 1175.54                                     |                    | <i>ND</i>          |
| <b>23c</b>        | <b>Tri-Tetra missing GlcNAc</b>              | 1609.86      | 1609.75                                     | <b>Down</b>        |                    |
| 25                | <i>Tri-Tetra-D-ALa-mDAP(NH<sub>2</sub>)</i>  | 2054.77      | 2054.95                                     |                    | <i>ND</i>          |
| 27b               | <i>Tri-D-ALa-mDAP (NH<sub>2</sub>) (2Ac)</i> | 1217.51      | 1217.55                                     |                    | <i>ND</i>          |

<sup>a</sup> Peak numbers and structures were previously assigned for *L. plantarum* NZ7100 [2].

<sup>b</sup> Tri, disaccharide tripeptide (L-Ala-D-iGln-mDAP(NH<sub>2</sub>)); Tetra, disaccharide tetrapeptide (L-Ala-D-iGln-mDAP(NH<sub>2</sub>)-D-Ala); Disaccharide, GlcNAc-MurNAc; (NH<sub>2</sub>), amidation; Ac, acetylation on MurNAc or GlcNAc.

<sup>c</sup> Sodiated molecular ions were the most abundant ones on Maldi-Tof mass spectra for all mucopeptides.

<sup>d</sup> The mucopeptides that have changed in abundance in Acm2- and LytA-deficient strains compared to strain NZ7100 (WT) are bold and italics, respectively. Their identity or their absence was checked by Maldi-Tof mass spectrometry analysis of the peaks of the mutant chromatograms. Symbols: ND, not detected in the mutant compared to WT; Down, reduced amount of at least 50%.

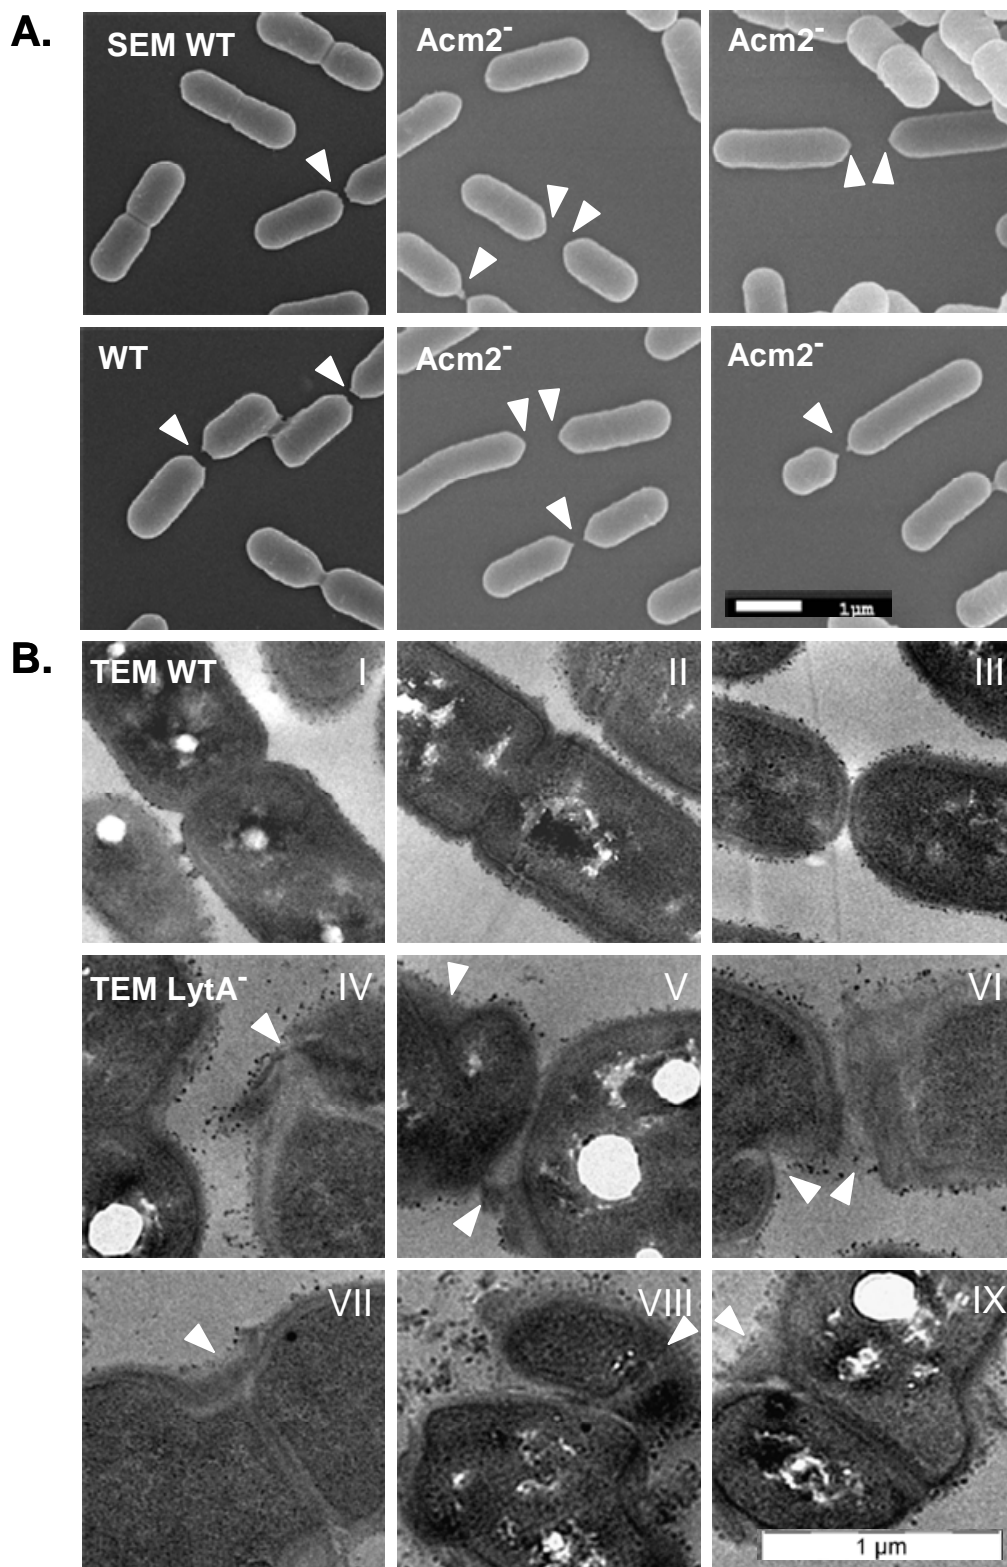

**FIG. S1.** Cell separation defects of Acm2<sup>-</sup> and LytA<sup>-</sup> mutant strains compared to NZ7100 (WT, control). A. Micrographs obtained by scanning electron microscopy (SEM) showing more pointed poles (white arrows) after cell separation for Acm2<sup>-</sup> mutant cells compared to WT cells. B. Transmission electron microscopy (TEM) showing altered septum formation (white arrows) for LytA<sup>-</sup> mutant cells (IV, V, VI, VII, VIII, and IX) compared to WT cells (I, II, and III). Growth conditions as defined in the legend of Fig. 2.

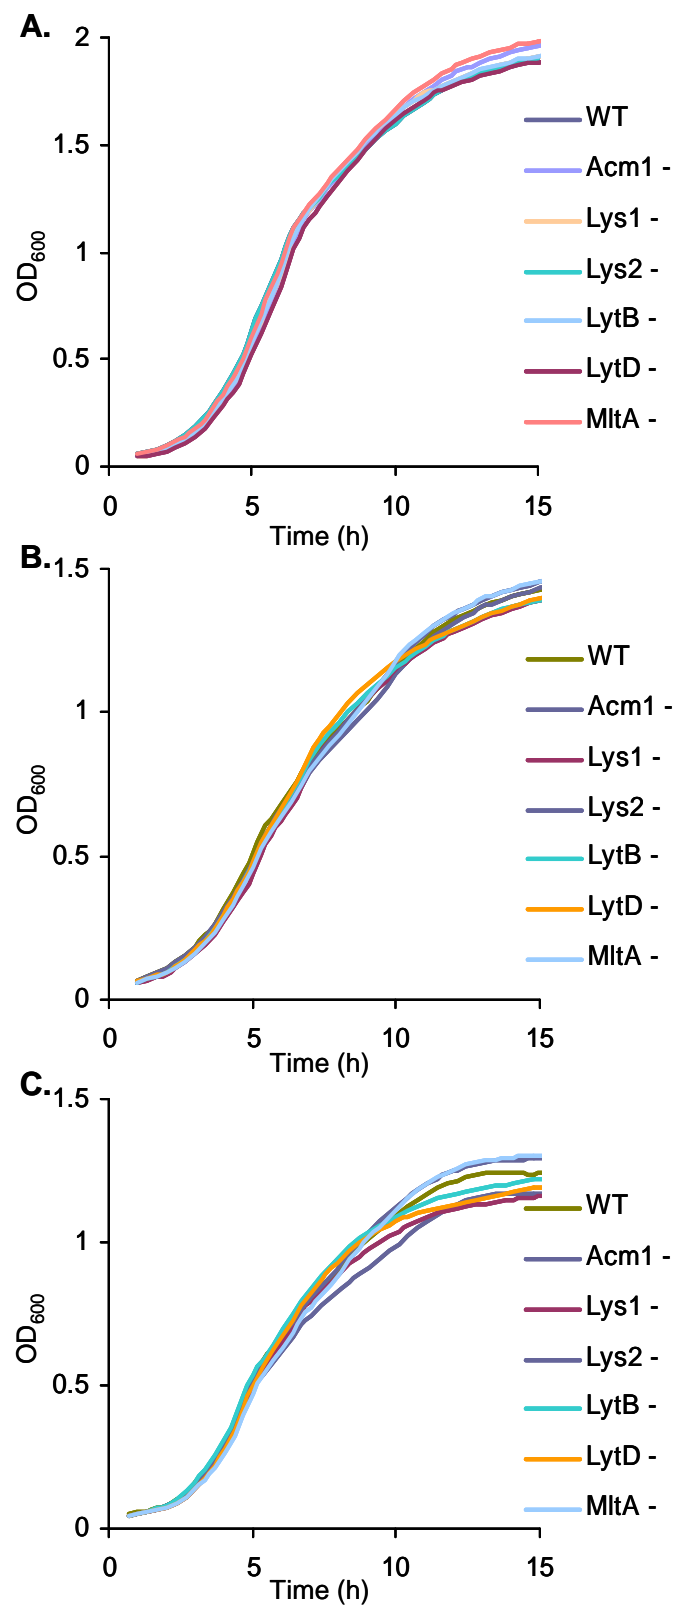

**FIG. S2.** Growth curves of *L. plantarum* NZ7100 (WT), *acm1* mutant (*Acm1*<sup>-</sup>), *lys1* mutant (*Lys1*<sup>-</sup>), *lys2* mutant (*Lys2*<sup>-</sup>), *lytB* mutant (*LytB*<sup>-</sup>), *lytD* mutant (*LytD*<sup>-</sup>), *mtlA* mutant (*MtlA*<sup>-</sup>), in MRS (A), CDM (B) and SCDM (C). Mean values (n=3).

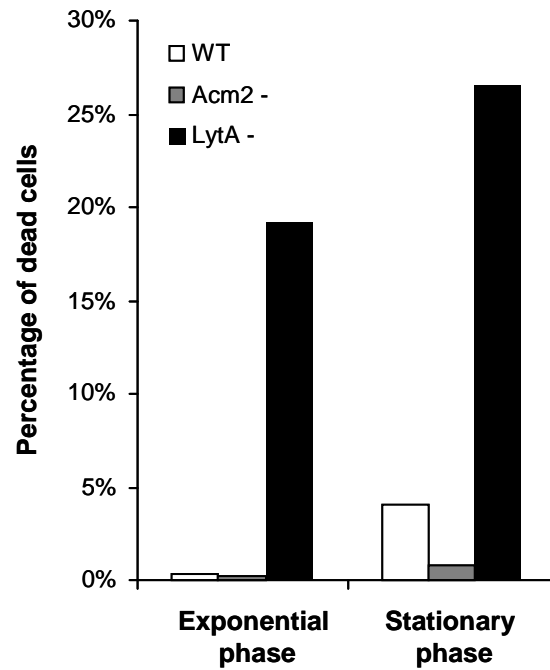

**FIG. S3.** Effect of *acm2* and *lytA* mutations on cell integrity. Percentage of dead cells was monitored in MRS medium in the exponential (6 h) and stationary (16 h) growth phases for *L. plantarum* NZ7100 (WT), Acm2<sup>-</sup>, and LytA<sup>-</sup>. Cell counting was performed by epifluorescence microscopy using propidium iodide (red; labels damaged cells) and SYTO-9 (green; labels all cells). The percentage of damaged cells labeled with propidium iodide was calculated with respect to the total number of cells labeled with SYTO-9. Enumeration was done for a minimum of 300 cells for each strain.

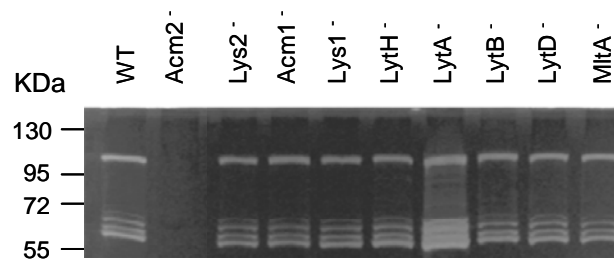

**FIG. S4.** Zymogram with cell extracts of *L. plantarum* NZ7100 (WT), *acm2* mutant (*Acm2*<sup>-</sup>), *lys2* mutant (*Lys2*<sup>-</sup>), *acm1* mutant (*Acm1*<sup>-</sup>), *lys1* mutant (*Lys1*<sup>-</sup>), *lytH* mutant (*LytH*<sup>-</sup>), *lytA* mutant (*LytA*<sup>-</sup>), *lytB* mutant (*LytB*<sup>-</sup>), *lytD* mutant (*LytD*<sup>-</sup>) and *mltA* mutant (*MltA*<sup>-</sup>) against dead cells of WT.



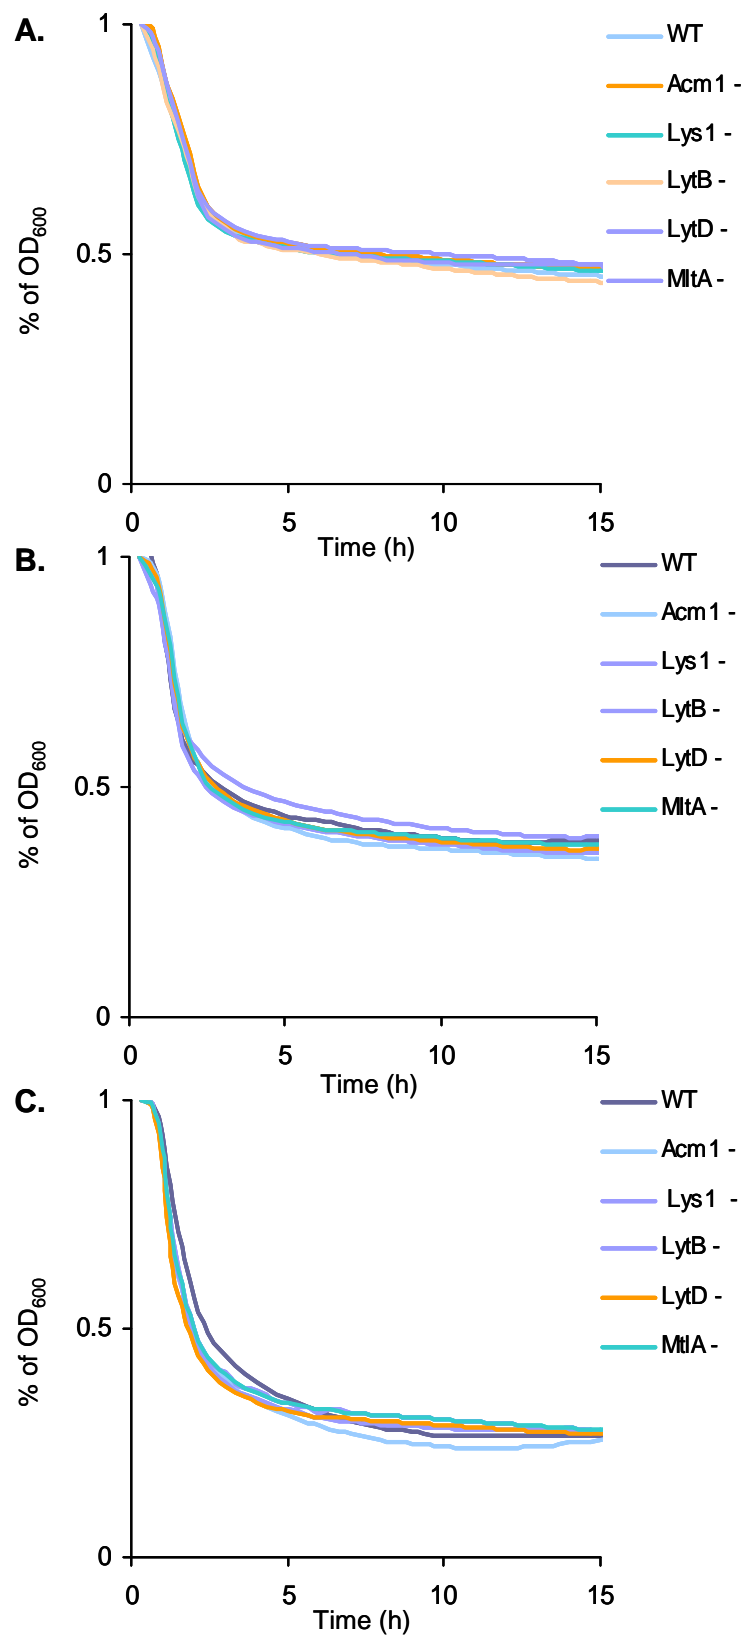

**FIG. S5.** Autolysis curves in presence of Triton X-100 (0.05%) of *L. plantarum* NZ7100 (WT), *acm1* mutant (Acm1<sup>-</sup>), *lys1* mutant (Lys1<sup>-</sup>), *lytB* mutant (LytB<sup>-</sup>), *lytD* mutant (LytD<sup>-</sup>), *mtlA* mutant (MtlA<sup>-</sup>), in MRS (A), CDM (B) and SCDM (C). Mean values (n=3).

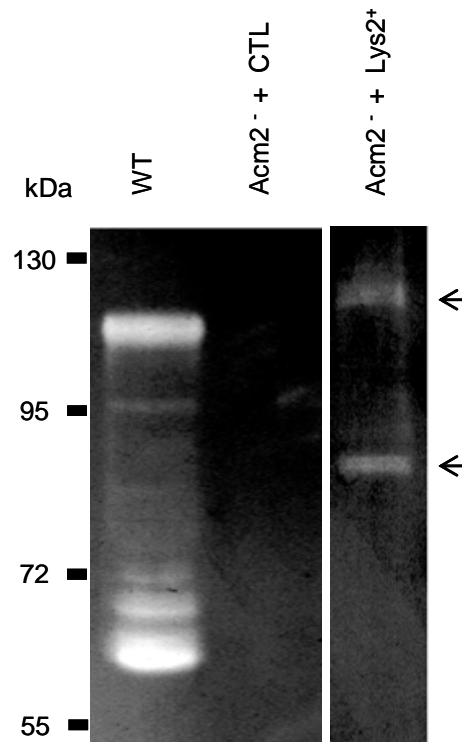

**FIG. S6.** Zymogram with cell extracts of *L. plantarum* NZ7100 (WT), *acm2* mutant carrying the empty plasmid pNZ8048 ( $Acm2^- + CTL$ ), and *acm2* mutant overexpressing *lys2* ( $Acm2^- + Lys2^+$ ) grown in presence of the nisin inducer in MRS against dead cells of WT.

#### REFERENCES

1. Bron PA, Wels M, Bongers RS, van Bokhorst-van de Veen H, Wiersma A, Overmars L *et al.*: **Transcriptomes reveal genetic signatures underlying physiological variations imposed by different fermentation conditions in *Lactobacillus plantarum*.** *PLoS One* 2012, **7**: e38720.
2. Bernard E, Rolain T, Courtin P, Guillot A, Langella P, Hols P *et al.*: **Characterization of O-acetylation of N-acetylglucosamine: a novel structural variation of bacterial peptidoglycan.** *J Biol Chem* 2011, **286**: 23950-23958.
